# Supplementary material
Source: PubMed Central journal article supplement (PMC6422767)
Supplement: NIHMS1017384-supplement-Supplementary.pdf [file NIHMS1017384-supplement-Supplementary.pdf]

# Supporting Information

## Calmodulin (CaM) Activates PI3K $\alpha$ by Targeting the “Soft” CaM-Binding Motifs in Both the nSH2 and cSH2 Domains of p85 $\alpha$

Mingzhen Zhang,<sup>†</sup> Zhigang Li,<sup>‡</sup> Guanqiao Wang,<sup>§</sup> Hyunbum Jang,<sup>†</sup> David B. Sacks,<sup>‡</sup> Jian  
Zhang,<sup>§</sup> Vadim Gaponenko,<sup>¶</sup> and Ruth Nussinov<sup>\*,†,#</sup>

<sup>†</sup>Cancer and Inflammation Program, Leidos Biomedical Research, Inc., Frederick National  
Laboratory for Cancer Research Sponsored by the National Cancer Institute, Frederick,  
Maryland 21702, United States

<sup>‡</sup>Department of Laboratory Medicine, National Institutes of Health, Bethesda, Maryland 20892,  
United States

<sup>§</sup>Department of Pathophysiology, Key Laboratory of Cell Differentiation and Apoptosis of  
Ministry of Education, Shanghai Jiao-Tong University School of Medicine, Shanghai 200025,  
China

<sup>¶</sup>Department of Biochemistry and Molecular Genetics, University of Illinois at Chicago,  
Chicago, Illinois 60607, United States

<sup>#</sup>Department of Human Molecular Genetics and Biochemistry, Sackler School of Medicine, Tel  
Aviv University, Tel Aviv 69978, 12 Israel

\*To whom correspondence should be addressed: Ruth Nussinov, Cancer and Inflammation  
Program, National Cancer Institute at Frederick, Leidos Biomedical Research, Inc., Frederick  
National Laboratory for Cancer Research, Frederick, MD 21702, Phone: (301) 846-5579; E-  
mail: nussinov@mail.nih.gov

**FIGURE S1.** The initial structures for CaM-SH2 complexes.

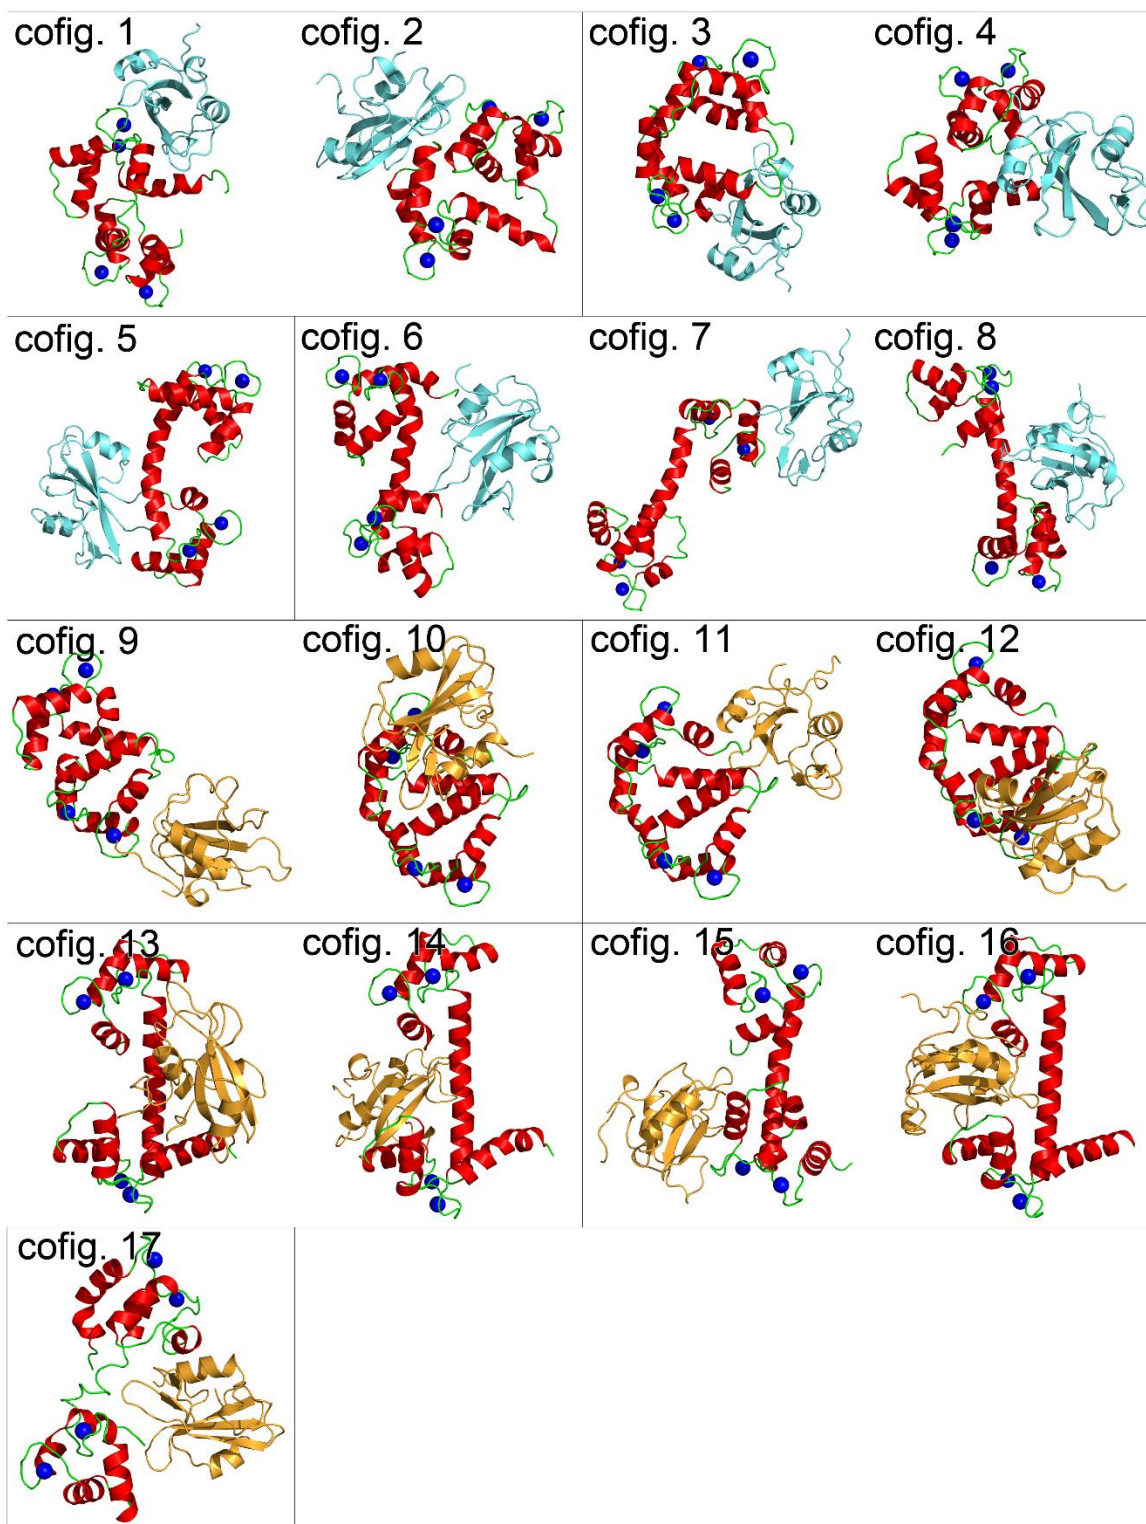

**FIGURE S2.** The initial structures for CaM-SH2<sup>α</sup> complexes.

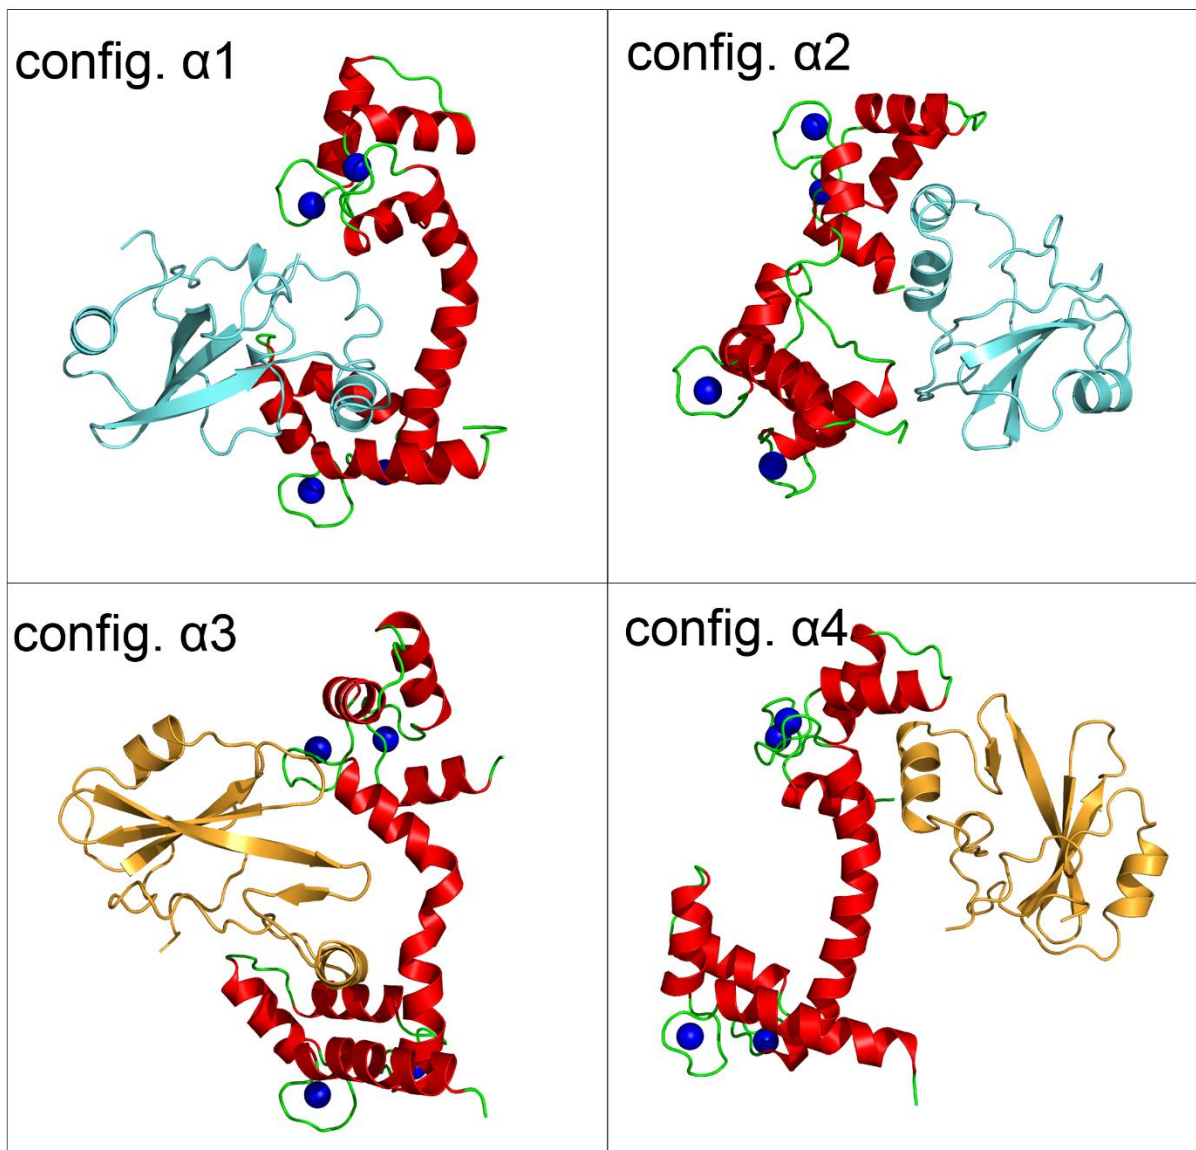

**FIGURE 3.** Scanning of CaM-binding motifs in (A) nSH2 and (B) cSH2 domains.

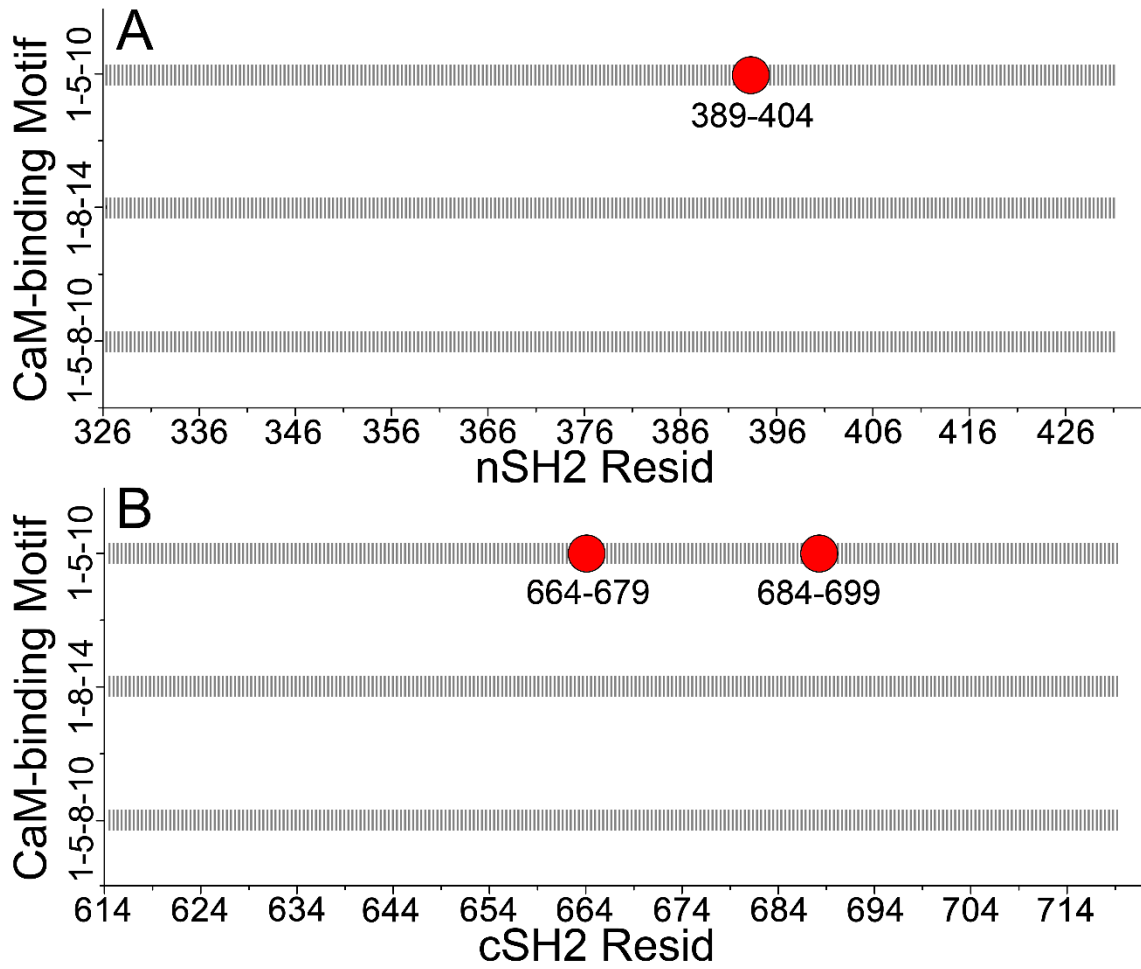

**FIGURE S4.** The final structures for CaM-SH2 complexes.

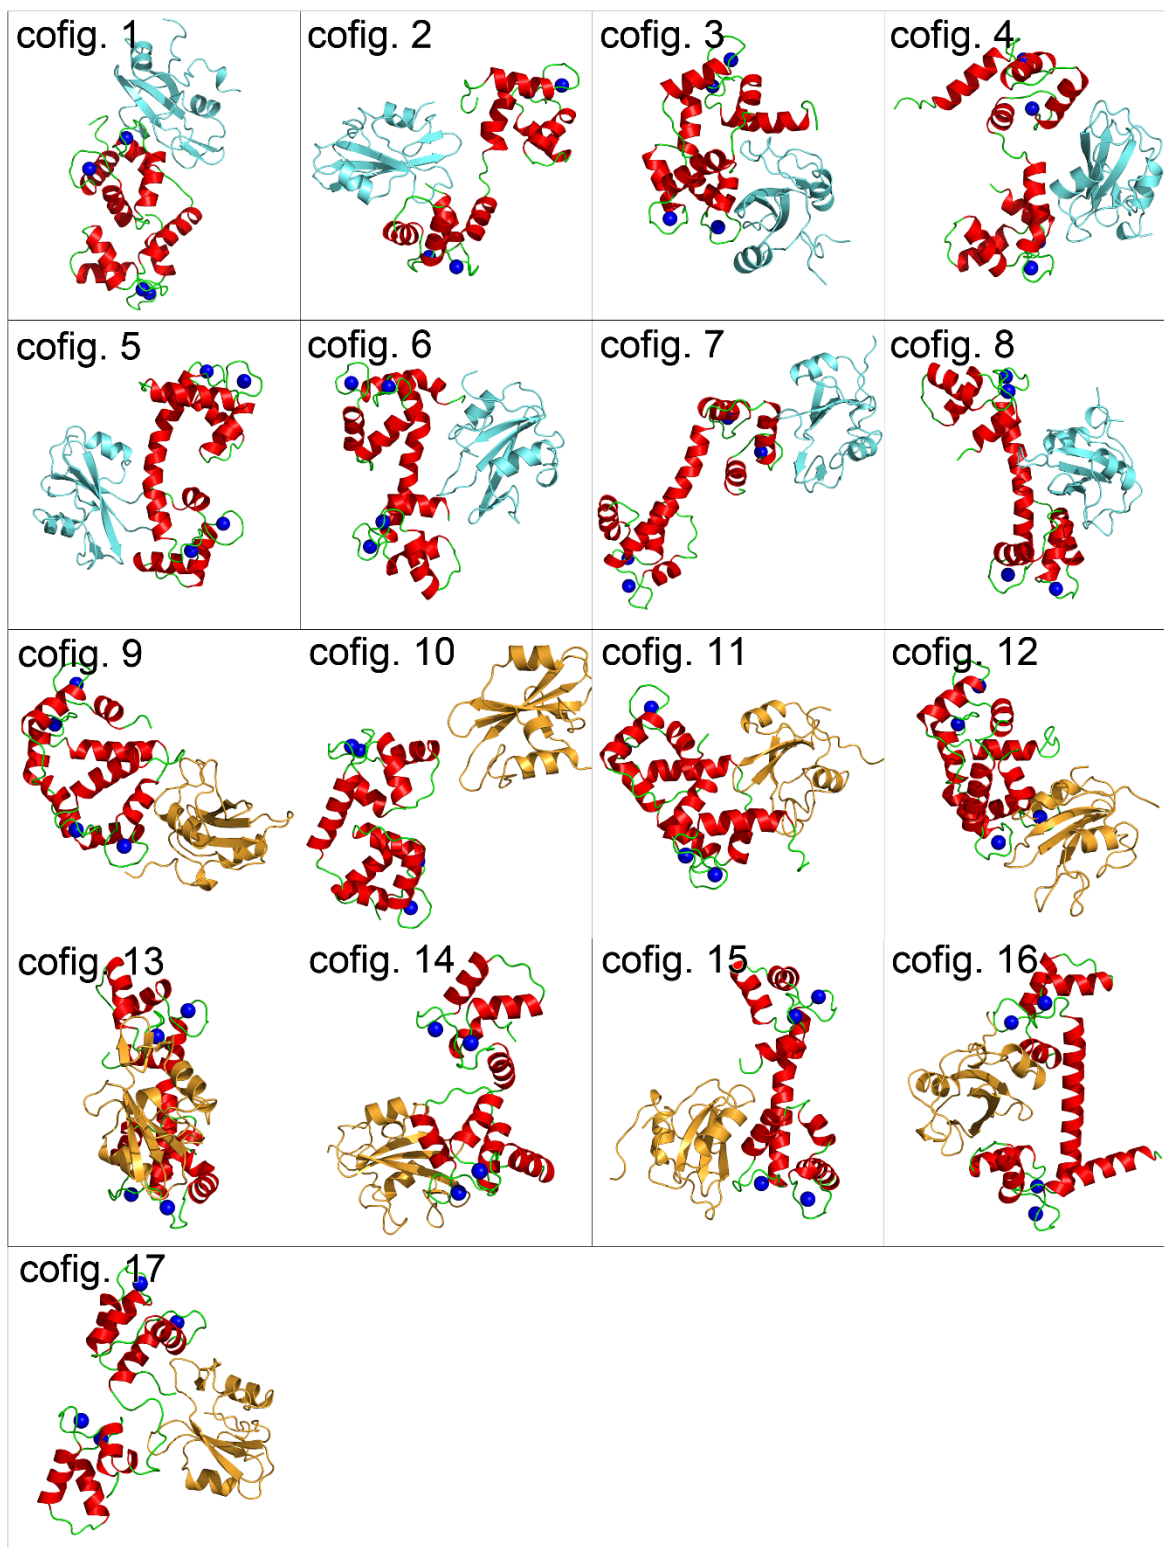

**Table S1.** Summary of simulation systems.

| configurations           | total number of atoms | number of waters | time  |
|--------------------------|-----------------------|------------------|-------|
| configuration 1          | 58865                 | 18246            | 500ns |
| configuration 2          | 51648                 | 15845            | 500ns |
| configuration 3          | 49310                 | 15067            | 500ns |
| configuration 4          | 61503                 | 19124            | 500ns |
| configuration 5          | 61671                 | 19180            | 500ns |
| configuration 6          | 70183                 | 22012            | 500ns |
| configuration 7          | 74220                 | 23355            | 500ns |
| configuration 8          | 65537                 | 20466            | 500ns |
| configuration 9          | 60199                 | 18715            | 500ns |
| configuration 10         | 55470                 | 17142            | 500ns |
| configuration 11         | 53875                 | 16611            | 500ns |
| configuration 12         | 52041                 | 16001            | 500ns |
| configuration 13         | 71768                 | 22564            | 500ns |
| configuration 14         | 72512                 | 22812            | 500ns |
| configuration 15         | 63712                 | 19884            | 500ns |
| configuration 16         | 69688                 | 21872            | 500ns |
| configuration 17         | 52805                 | 16255            | 500ns |
| configuration $\alpha$ 1 | 59411                 | 18428            | 500ns |
| configuration $\alpha$ 2 | 56627                 | 17502            | 500ns |
| configuration $\alpha$ 3 | 54343                 | 16767            | 500ns |
| configuration $\alpha$ 4 | 57226                 | 17726            | 500ns |
